# Supplementary material for: Photo- and Thermocatalytic CO2 Methanation: A Comparison of Ni/Al2O3 and Ni–Ce Hydrotalcite-Derived Materials under UV and Visible Light
Source: MDPI journal article supplement (doi:10.3390/ma16175907), 2023-08-29
Supplement: s1 [file s1]

**Supplementary material:**

**Article: Photo- and Thermocatalytic CO<sub>2</sub> Methanation: A Comparison of Ni/Al<sub>2</sub>O<sub>3</sub> and Ni-Ce Hydrotalcite-Derived Materials under UV and Visible Light**

**Materials for catalyst synthesis**

- Ni(NO<sub>3</sub>)<sub>2</sub>·6H<sub>2</sub>O (Sigma-Aldrich)
- Mg(NO<sub>3</sub>)<sub>2</sub>·6H<sub>2</sub>O (Honeywell)
- Al(NO<sub>3</sub>)<sub>3</sub>·9H<sub>2</sub>O Merck (Labkem)
- Ce(NO<sub>3</sub>)<sub>3</sub>·6H<sub>2</sub>O (Sigma-Aldrich)
- γ-Al<sub>2</sub>O<sub>3</sub> (Alfa Aesar)
- Na<sub>2</sub>CO<sub>3</sub>·H<sub>2</sub>O (Panreac)
- NaOH (Honeywell)
- Ammonia 25 % (as NH<sub>3</sub>) (Panreac)

The following figures and tables are added as supplementary information.

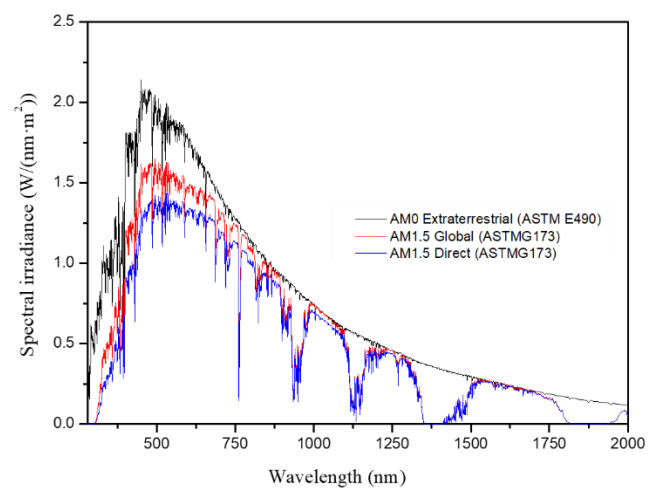

**Figure S1.** Standard solar spectra for space and terrestrial use.

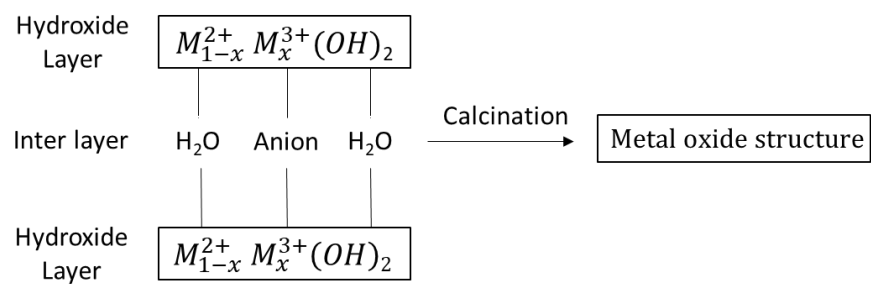

**Figure S2.** Scheme of the structure of the hydrotalcite before and after calcination.

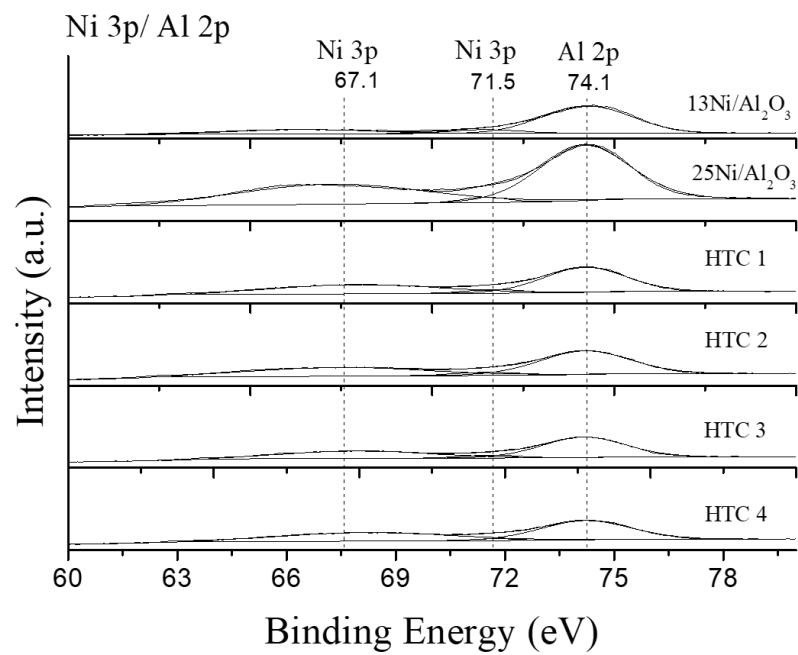

**Figure S3.** Al 2p-Ni 3p spectra.

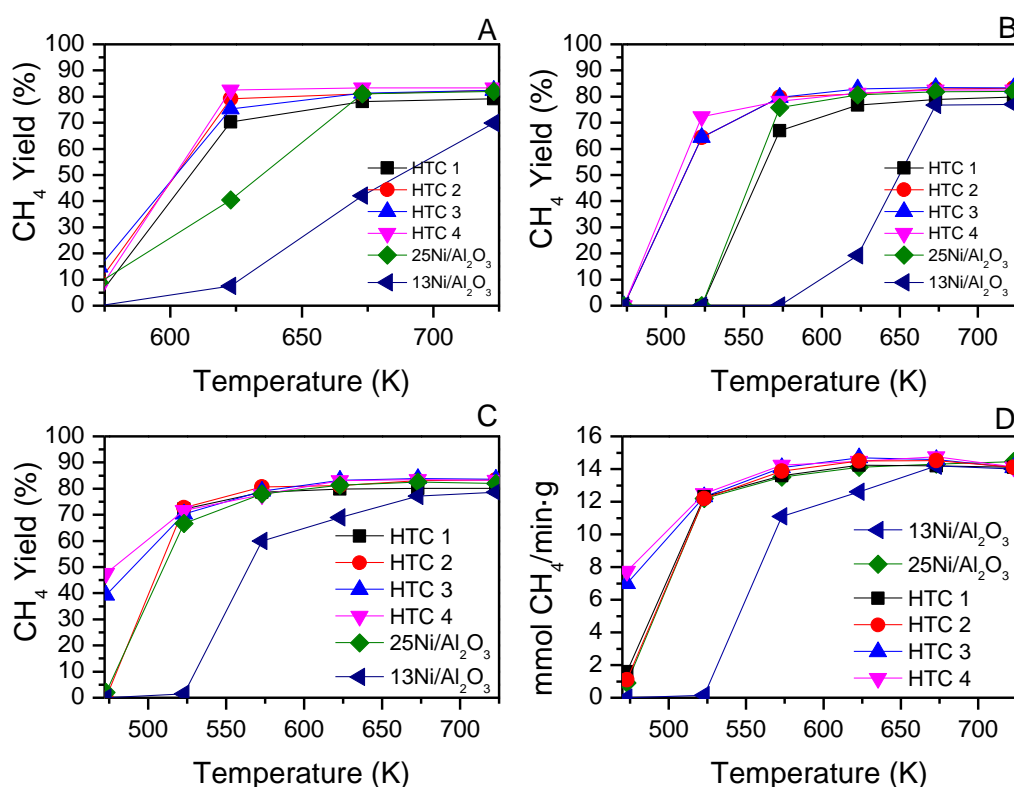

**Figure S4.** Methane production rate with visible light. Comparison of CH<sub>4</sub> yield enhanced by temperature dark (A), UV light (B), and visible light (C). Methane production rate with visible light (D).

**Table S1.** Ni 2p<sub>3/2</sub> and Ce 3d<sub>5/2</sub> binding energy of the reduced catalysts.

|                                     | Ni <sup>0</sup> | Ni <sup>2+</sup> | Ni <sup>2+</sup> <sub>sat</sub> | Ce <sup>3+</sup> (x <sub>2</sub> and x <sub>4</sub> ) | Ce <sup>4+</sup> (x <sub>1</sub> and x <sub>3</sub> ) |
|-------------------------------------|-----------------|------------------|---------------------------------|-------------------------------------------------------|-------------------------------------------------------|
| 13Ni/Al <sub>2</sub> O <sub>3</sub> | 852.9           | 857.0            | 862.3                           |                                                       |                                                       |
| 25Ni/Al <sub>2</sub> O <sub>3</sub> | 852.2           | 855.9            | 861.4                           |                                                       |                                                       |
| HTC 1                               | 853.2           | 856.8            | 862.9                           |                                                       |                                                       |
| HTC 2                               | 852.5           | 856.4            | 862.1                           | 880.6–885.5                                           | 882.2–888.7                                           |
| HTC 3                               | 853.0           | 856.6            | 861.9                           | 880.5–886.3                                           | 882.8–888.1                                           |
| HTC 4                               | 852.8           | 856.4            | 862.0                           | 880.6–885.6                                           | 882.7–888.9                                           |

**Table S2.** Surface composition (XPS) and bulk composition (EDS) of the used samples.

|                                     | Atomic composition (XPS) |       | Atomic composition (STEM-EDS) |       |
|-------------------------------------|--------------------------|-------|-------------------------------|-------|
|                                     | Ce/Al                    | Ni/Al | Ce/Al                         | Ni/Al |
| 25Ni/Al <sub>2</sub> O <sub>3</sub> |                          | 0.159 |                               | 0.263 |
| 13Ni/Al <sub>2</sub> O <sub>3</sub> |                          | 0.069 |                               | 0.105 |
| HTC 1                               |                          | 0.221 |                               | 0.375 |
| HTC 2                               | 0.046                    | 0.263 | 0.0786                        | 0.375 |
| HTC 3                               | 0.075                    | 0.291 | 0.125                         | 0.366 |
| HTC 4                               | 0.101                    | 0.185 | 0.140                         | 0.345 |

## Characterization of catalysts

**Textural properties:** N<sub>2</sub> adsorption-desorption isotherms at 77 K were measured for analyzing the specific surface area, pore volume and pore size distribution by an Autosorb 1C-TCD. In order to remove moisture and any adsorbed gases, samples were firstly degassed at 573 K for 2h.

**ICP-OES:** Metal analysis employed for catalysts was a Perkin Elmer Optima 2000 OV measuring the Ni, Al, Mg and Ce contents. The solid samples were firstly digested by aqua regia (mixture of 3:1 HCl and HNO<sub>3</sub> respectively) at 453 K and then analyzed for identifying the composition and chemical elements according to their characteristic wavelength emission intensity.

**H<sub>2</sub>-TPR:** The reducibility of the catalysts was measured by the temperature programmed reduction employing the Autochem. II Instrument (Micromeritics, USA) Samples were firstly degassed at 383 K for 30 min, cooled down to room temperature and finally, heated up to 1173 K in the case of HTCs and 873 K for Ni/Al<sub>2</sub>O<sub>3</sub> carried out over 5 % H<sub>2</sub>/Ar flow (30. ml·min<sup>-1</sup>).

**CO<sub>2</sub>-TPD:** Temperature programmed desorption was performed on the same device as H<sub>2</sub>-TPR for surface basicity characterization. The sample was degassed in helium at 573K for 2 h and then cooled at 353 K prior to adsorption of CO<sub>2</sub> at this temperature. After the adsorption of CO<sub>2</sub> (25 ml·min<sup>-1</sup>) for 1 h the sample was treated with He (40 ml·min<sup>-1</sup>) for 1h at same temperature in order to remove the physical adsorbed CO<sub>2</sub> from the surface. The desorption curve was recorded at a heating rate of 10 K/min from 353 K to 773 K under He (15 ml·min<sup>-1</sup>).

**XRD:** Structural characterization of powder XRD patterns were recorded on a PANalytical Xpert Pro diffractometer using a  $\lambda$ CuK $\alpha$  radiation =0.15418 nm at 40kV and 40mA between 2 $\theta$ =5° to 80° for identifying the crystalline species.

**H<sub>2</sub>-chemisorption:** Metal dispersion (%) and metallic surface area were determined via H<sub>2</sub> chemisorption method using a Micromeritics Autochem-II. Prior to the analysis, 25 mg of calcined catalyst was pre-reduced according to TPR-H<sub>2</sub> studies for 2 h using 50ml·min<sup>-1</sup> of 5 vol%

H<sub>2</sub> in Ar. Then H<sub>2</sub> chemisorption analysis was made at room temperature using the same reducing gas.

**XPS:** X-ray Photoelectron Spectroscopy (XPS) measurements were performed on a SPECS system (Berlin, Germany) equipped with Phoibos 150 1D-DLD analyzer and monochromatic Al K $\alpha$ (1486.7 eV) radiation source. Spectra were fitted using CasaXPS 2.3.16 software, which models Gauss-Lorentzian contributions, after background subtraction (Shirley). Concentrations were calculated by correcting the values with relative atomic sensitivity factors (Scofield).

**UV-Vis DRS:** The absorption signal in series of the calcined catalysts were determined by a Shimadzu 3600 UV-vis spectrophotometer collecting data between 200 and 800 nm.

**STEM-EDS:** All HTC<sub>s</sub> and Ni/Al<sub>2</sub>O<sub>3</sub> catalysts were studied by the Analytical Titan operates in STEM mode at voltages between 60 and 300 kV combined with energy-dispersive X-ray spectroscopy (EDS) with a magnification of 320 K.
